# Supplementary material
Source: PubMed Central journal article supplement (PMC1446084)

**A**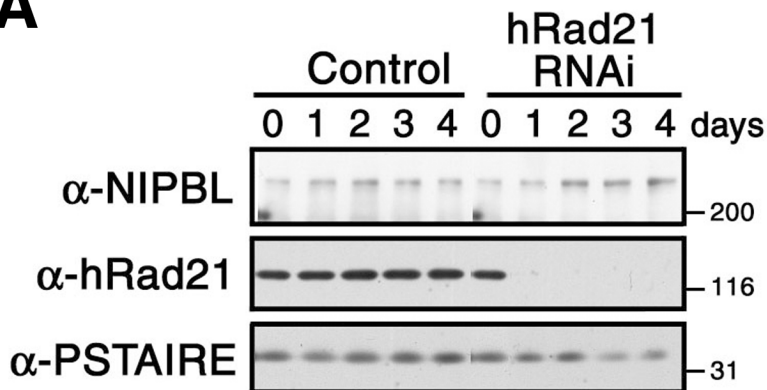**B**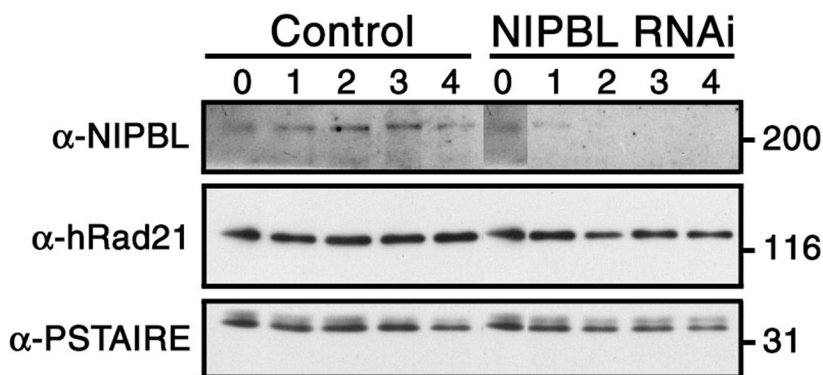**C**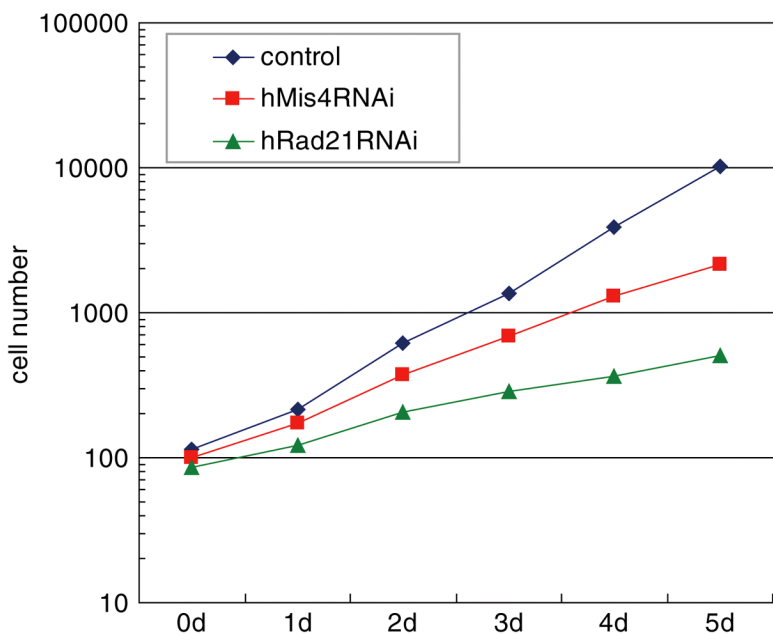

Supplement: mbc_E05-11-1089_1.pdf [file mbc_E05-11-1089_1.pdf]

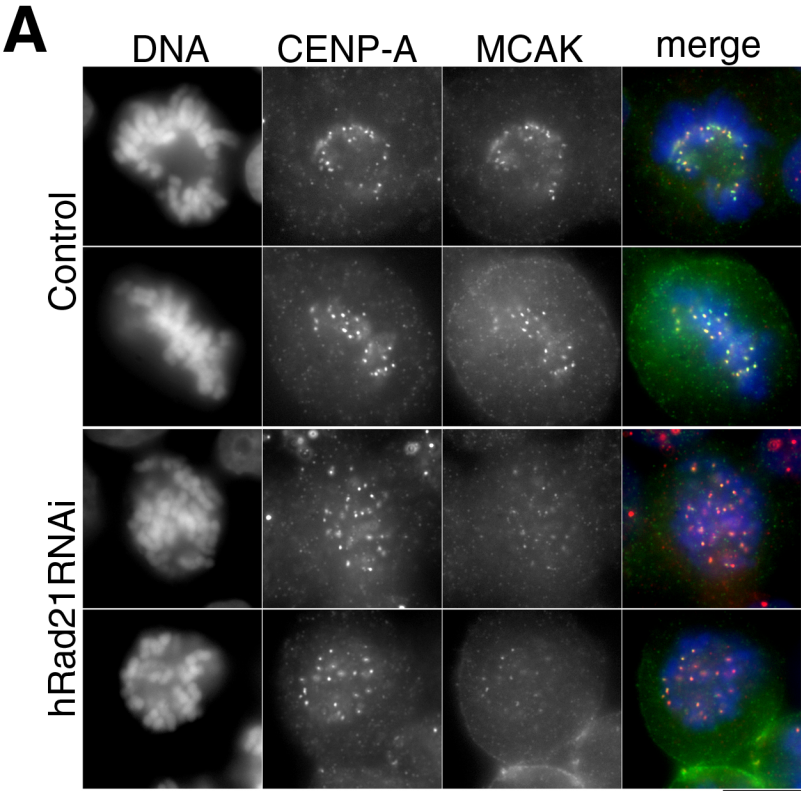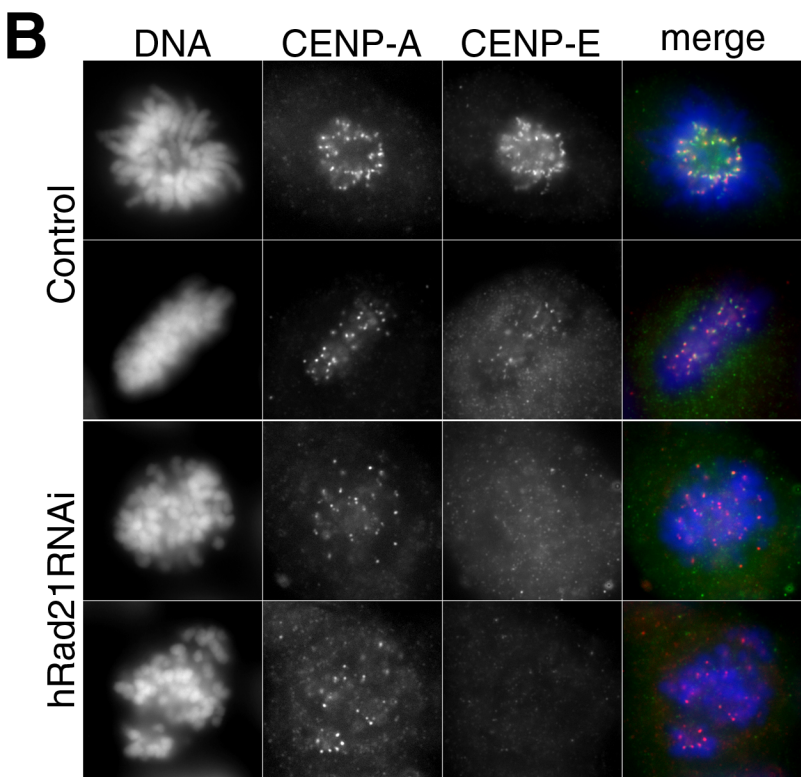

Supplement: mbc_E05-11-1089_2.pdf [file mbc_E05-11-1089_2.pdf]
